## Preserved cortical maps of the body in Complex Regional Pain Syndrome

Flavia Mancini<sup>1,2,\*,#</sup>, Audrey P Wang<sup>3,4,\*</sup>, Mark M. Schira<sup>3,5</sup>, Zoey J. Isherwood<sup>5</sup>, James H. McAuley<sup>3,6</sup>, Giandomenico D Iannetti<sup>2</sup>, Martin I. Sereno<sup>7,8</sup>, G. Lorimer Moseley<sup>3,9</sup>,  
Caroline D. Rae<sup>3,6</sup>

<sup>1</sup>*Computational and Biological Learning, Department of Engineering, University of Cambridge, Cambridge, UK*

<sup>2</sup>*Department of Neuroscience, Physiology and Pharmacology, University College London, London, UK*

<sup>3</sup>*Neuroscience Research Australia (NeuRA), Sydney, Australia*

<sup>4</sup>*School of Physiotherapy, Faculty of Health Sciences, Australian Catholic University, North Sydney, Australia*

<sup>5</sup>*School of Psychology, University of Wollongong, Wollongong, Australia*

<sup>6</sup>*School of Medical Sciences, University of New South Wales, Sydney, Australia*

<sup>7</sup>*Department of Psychology, University College London, London, UK*

<sup>8</sup>*Department of Psychology, San Diego State University, San Diego, USA*

<sup>9</sup>*School of Health Sciences, University of South Australia, Adelaide, Australia*

\* *Shared contribution*

# *Corresponding author:*

Flavia Mancini

University of Cambridge

Department of Engineering

Computational and Biological Learning

Trumpington Street, Cambridge, CB2 1PZ

fm456@cam.ac.uk

## Abstract

Chronic pain can be associated with functional and morphological changes in the brain. It has long been thought that some severe chronic pain conditions, such as Complex Regional Pain Syndrome (CRPS), are not only associated with, but even maintained by a reorganisation of the somatotopic representation of the affected limb in the primary somatosensory cortex (S1). This notion has driven treatments that aim to restore S1 representations, such as sensory discrimination training and mirror therapy. However, this notion is based on both indirect and incomplete evidence obtained with imaging methods with low spatial resolution. Here, we used functional MRI to characterize the S1 representation of the affected and unaffected hand in patients with unilateral CRPS of one hand. Our study demonstrates that the cortical area, location, and geometry of the S1 representation of the CRPS hand are comparable to those of the healthy hand, as well as to those of controls. Given that S1 representations are largely preserved in CRPS patients, it is compelling to reconsider not only the cortical mechanisms that underlie the disorder, but also the rationale for interventions that aim to “restore” somatotopic representations.

## Introduction

Chronic pain is a highly common and debilitating disorder, that can be associated with functional and morphological changes in the brain. For instance, it has long been thought that some severe chronic pain conditions, such as Complex Regional Pain Syndrome (CRPS), are not only associated with, but even maintained by, maladaptive plasticity in the primary somatosensory cortex (S1) (Maihofner et al., 2003a, 2004). Magneto- and electro-encephalography (MEG, EEG) studies have suggested that the representation of the CRPS hand in S1 is abnormally smaller than the cortical representation of the healthy hand (for a review, see Di Pietro et al., 2013). The notion of S1 reorganisation has been central to our understanding of the condition (Marinus et al., 2011) and has driven physiotherapy interventions aimed at restoring sensorimotor representations of CRPS limbs, such as mirror-visual feedback (McCabe et al., 2003; Smart et al., 2016) and sensory discrimination training (Pleger et al., 2005; Moseley et al., 2008b). Here, we revisit the notion of S1 reorganisation with the better tools that functional MRI currently offers: high spatial resolution and phase encoded methods that provide reliable and unbiased measures of the cortical somatotopy of the hand (Mancini et al., 2012; Sanchez-Panchuelo et al., 2012; Kolasinski et al., 2016a).

One of the issues affecting all previous studies on CRPS is that the size of the hand map was estimated both *indirectly and incompletely*: it was estimated by measuring the Euclidean distance between activation loci of the thumb or index finger relative to little finger. The somatotopy of the full hand has never been characterized in CRPS patients. A more reliable fMRI method for studying cortical topographic representations is based on phase-encoded mapping, which reveals the spatial preference of cortical neural populations (Serenio et al., 1995; Silver and Kastner, 2009; Serenio and Huang, 2014). This method involves delivering a periodic sensory stimulus to different portions of the receptive surface (in our case, stroking one fingertip after the other in repeated cycles, Figure 1A) and evaluating which voxels selectively respond to the spatial frequency of the stimulation. Voxels sensitive to the stimulus respond when the stimulus passes through the preferred spatial location and decay as the stimulus moves away (Chen et al., 2017). This pattern of response is strikingly visible in the raw BOLD response at the individual voxel level (Figure 1B) and can be extracted using a Fourier transform (Mancini et al., 2012). The response phase angle indicates the location preference for each voxel - in other words, the position of the receptive fields of the population of neurons sampled by the voxel.

Using phase-encoded mapping, we provide the first complete characterisation and quantification of the representation of the fingers (i.e., with exclusion of the thumb) in patients with chronic and unilateral CRPS to the upper limb. We tested whether the S1 representation of the fingertips of the affected hand was different from that of the healthy hand of CRPS patients and from controls in terms of its (1) spatial extent, (2) location relative to the central sulcus, and (3) geometry (i.e., variability of the map gradients).

## Results

### Demographics and pain sensitivity

Table 1 reports the demographic and clinical information of the study sample (Healthy controls:  $n = 17$ ; CRPS to the left hand:  $n = 8$ ; CRPS to the right hand:  $n = 10$ ). Age was comparable in the control group (mean  $\pm$  SD,  $44.87 \pm 11.95$  years) and in the pooled group of patients with left CRPS and right CRPS ( $44.15 \pm 11.30$ ; independent samples t-test:  $t_{33} = 0.19$ ,  $p = 0.856$ ,  $BF_{10} = 0.329$ ). Handedness was evaluated using the Edinburgh Handedness Inventory, which yields a laterality score that ranges from -100 (left-hand dominant) to +100 (right-hand dominant) (Oldfield, 1971). This laterality score was comparable in controls ( $73.56 \pm 49.84$ ) and patients ( $61.56 \pm 58.13$ ; independent samples t-test:  $t_{33} = 0.65$ ,  $p = 0.518$ ,  $BF_{10} = 0.384$ ). Age and disease duration of patients were similar to those found in the UK CRPS Registry (Shenker et al., 2015): mean age at onset was  $43 \pm 12.7$  years ( $n = 239$ ) and mean pain duration was 2.9 years ( $n = 237$ ) in the UK CRPS registry.

As expected, CRPS patients were more sensitive to pressure related pain, with lower average pain pressure threshold (PPT) on their affected hand ( $3.44 \pm 3.79$ ) compared to the unaffected hand ( $7.56 \pm 11.01$ ; paired samples t-test:  $t_{17} = -2.21$ ,  $p = 0.041$ ,  $BF_{10} = 1.679$ ). Confirming that the CRPS was unilateral, PPTs on the unaffected hand of CRPS patients were comparable to those of controls (average left and right hand of controls  $\pm$  SD,  $10.74 \pm 14.91$ ; independent samples t-test:  $t_{33} = 0.72$ ,  $p = 0.476$ ,  $BF_{10} = 0.398$ ). Ratings of spontaneous pain did not vary in a consistent fashion before and after the imaging session (mean difference  $\pm$  SD,  $0.59 \pm 2.53$ ;  $t_{16} = 0.96$ ,  $p = 0.351$ ,  $BF_{10} = 0.281$ ).

### Somatotopic representation of the hand in S1

We stimulated the tips of each finger in succession, as shown in Figure 1A, using a mechanical probe. All control participants reported the mechanical stimulus as being clearly detectable, neither painful nor unpleasant, and similarly intense on the two hands. All patients described the sensation elicited by stimulation of the unaffected fingers similarly to controls, whereas they described the allodynia elicited by stimulating the affected fingers in a variety of ways; “burning”, “tingling”, “pain”, “brushing like with a sharp object”, “horrible”, “itchy”, “scraping”, “like a needle prick”, “electric shooting pain”.

Mechanical stimulation to the fingertips elicited a periodic response in the hand region of S1. A selection of single-subjects maps is shown in Figure 2, and the average maps are displayed in Figure 3. The map phase angle (indicating finger preference) is displayed using a continuous colour scale (red to green to blue to yellow), whose saturation is masked by the statistical threshold. All analyses were performed on individual subject data (cluster-corrected at  $p < 0.01$ ), and uncorrected group maps ( $p < 0.05$ ) are displayed in Figure 3 merely for illustration. Phases corresponding to rest (no stimulation) have been truncated. The map showed a clear spatial gradient of digit

preference, progressing from d2 (index finger), to d3, d4 and d5 (little finger). The arrangement and location of the map was qualitatively similar to that reported in previous human fMRI studies (Sanchez-Panchuelo et al., 2010; Mancini et al., 2012; Besle et al., 2013; Martuzzi et al., 2014; Kolasinski et al., 2016a).

We tested whether the area, location, and functional geometry of the map of the affected hand was similar to those of the unaffected hand and controls. To do so, we defined individual ROIs as clusters located in S1 that showed a significant periodic response at the spatial frequency of stimulation (cluster-corrected,  $p < 0.01$ ).

### 1. Map area

We calculated the surface area of the left- and right-hand maps, from each participant ROI. This was done after resampling the phase maps onto the original average brain volume, to control for inter-individual variability in brain size. To increase statistical power, we pooled data from the two CRPS groups, after flipping the data from the right hand CRPS group so that the affected side is the left hand/right hemisphere in all patients. As evident in Figure 4A, the map area was comparable among groups and sides. A mixed-effects ANOVA with a within-subject factor 'side' (2-levels: affected, unaffected) and a between-subjects factor 'group' (2-levels: controls, CRPS) did not provide evidence for any main effect or interaction ('side':  $F_{1,28} = 0.281$ ,  $p = 0.60$ ,  $p\eta^2 = 0.010$ ; 'group':  $F_{1,28} = 1.555$ ,  $p = 0.223$ ,  $p\eta^2 = 0.053$ ; 'side' by 'group':  $F_{1,28} = 0.315$ ,  $p = 0.579$ ,  $p\eta^2 = 0.011$ ). A Bayesian mixed-effects ANOVA provided the stronger evidence for the null model ( $BF_{10} = 1$ ,  $P(M|data) = 0.492$ ) relative to models of 'group' ( $BF_{10} = 0.512$ ,  $P(M|data) = 0.252$ ), 'side' ( $BF_{10} = 0.305$ ,  $P(M|data) = 0.150$ ), 'side+group' ( $BF_{10} = 0.153$ ,  $P(M|data) = 0.075$ ), 'side+group+interaction' ( $BF_{10} = 0.126$ ,  $P(M|data) = 0.030$ ).

We checked whether there was any relation between map size and duration of disease. As the distribution of disease duration values was skewed towards small values, disease duration data were first transformed onto natural logarithms. Then, we fitted 1- and 2-degrees polynomial functions to the relation between disease duration and area of the map of the affected and unaffected hand, as shown in Figure 4B. There was weak evidence for a linear relation between CRPS duration and area of the map of the affected hand ( $p = 0.022$ , adjusted  $r^2 = 0.273$ ), whereas fitting of a quadratic function was poor ( $p = 0.07$ , adjusted  $r^2 = 0.233$ ). A Bayesian linear regression showed stronger evidence for a model in which the area of the map covaried with (log-transformed) disease duration ( $BF_{10} = 3.016$ ,  $P(M|data) = 0.030$ ) than for the null model ( $BF_{10} = 1$ ,  $P(M|data) = 0.249$ ): the longer was the disease, the smaller was the map of the affected hand.

We found no evidence for a linear ( $p = 0.657$ ) or quadratic ( $p = 0.780$ ) relation between the area of the map of the affected hand and pain intensity ratings obtained during the imaging session (ratings for each subject are reported in Table 1). The null model ( $BF_{10} = 1$ ,  $P(M|data) = 0.685$ ) won over a model in which the area of the map of the affected hand linearly covaried with pain intensity ratings ( $BF_{10} = 0.460$ ,  $P(M|data) = 0.315$ ).

Moreover, there was no evidence for a relation between the area of the map of the affected hand and a score of pain severity derived from PPTs ( $PP_{\text{severity}}$ ; 1-order polynomial:  $p = 0.135$ ; 2-order polynomial:  $p = 0.178$ ). A Bayesian linear regression showed that the null model ( $BF_{10} = 1$ ,  $P(M|data) = 0.510$ ) and a model with  $PP_{\text{severity}}$  ( $BF_{10} = 0.960$ ,  $P(M|data) = 0.490$ ) were similarly likely.

Finally, the area of the map of the unaffected hand was not explained by CRPS duration, pain intensity rating, or  $PP_{\text{severity}}$  (all  $ps > 0.3$ ; all  $BF_{10}$  for null models = 1; all  $BF_{10}$  for alternative models  $< 0.6$ ).

In summary, these analyses do not provide support for the hypothesis that the map of the CRPS hand was smaller than the map of the unaffected hand and that of healthy controls. However, we found moderate evidence that the map area of the CRPS hand was modulated by disease duration, suggesting that the more chronic was disease, the smaller was the map of the affected hand.

## 2. Map location

We calculated the centroid of the hand map, after resampling it onto an average spherical surface (see “Evaluation of hand map location” for details). This was done to control for individual differences in brain morphology and to obtain localisation measures that were not confounded by gyrification. Figure 5A-B shows the distribution of map centroids of each participant, resampled onto a canonical spherical cortical surface of an average brain: the map centroid location was variable among participants of each group, but visibly similar across groups. Indeed, the F-statistics based on the Fisher probability density function (Fisher, 1953) did not provide evidence for any directional difference between groups for either side (Table 2).

As a further comparison of the locations of map centroids across groups, we computed the geodesic distance, in mm, between the map centroid and an arbitrary reference point located within the concavity of the central sulcus (Figure 5C). Importantly, geodesic distance measures calculated onto average spherical surfaces are not confounded by gyrification and allow comparison of different subjects. This is a key advantage of our approach over previous studies which measured Euclidean distances between two finger representations. A mixed-effects ANOVA with a within-subject factor ‘side’ and a between-subjects factor ‘group’ did not provide evidence for any main effect or interaction (‘side’:  $F_{1,28} < 0.01$ ,  $p = 0.999$ ,  $p\eta^2 < 0.001$ ; ‘group’:  $F_{1,28} = 0.163$ ,  $p = 0.689$ ,  $p\eta^2 = 0.006$ ; ‘side’ by ‘group’:  $F_{1,28} = 0.254$ ,  $p = 0.619$ ,  $p\eta^2 = 0.009$ ). In a Bayesian mixed-effects ANOVA, the null model had stronger evidence ( $BF_{10} = 1$ ,  $P(M|data) = 0.581$ ) relative to models of ‘group’ ( $BF_{10} = 0.340$ ,  $P(M|data) = 0.198$ ), ‘side’ ( $BF_{10} = 0.262$ ,  $P(M|data) = 0.152$ ), ‘side+group’ ( $BF_{10} = 0.087$ ,  $P(M|data) = 0.051$ ), ‘side+group+interaction’ ( $BF_{10} = 0.032$ ,  $P(M|data) = 0.019$ ).

Altogether, these analyses indicate that the location of the hand map centroid was not affected by CRPS.

### 3. Map geometry

Finally, we evaluated the variability of the geometry of the map of the affected hand in CRPS patients. As illustrated in Figure 6A, the hand map exhibits a typical spatial gradient from index finger to little finger. The spatial gradient (i.e., the direction) of the map indicates the spatial progression of the map phases, providing a measure of the map geometry. We investigated whether the gradient directions of the map of the affected hand were more variable than those of the unaffected hand and controls. As a measure of map gradient variability, we calculated the circular variance of the gradient angles of each flattened, two-dimensional, surface ROI (see “Evaluation of hand map geometry” for details).

The gradient directions of the map of the affected hand were not differently variable (i.e., not differently spread) from those of the unaffected hand and controls (Figure 6B). A Harrison-Kanji test with a within-subject factor ‘side’ and a between-subjects factor ‘group’ on the gradient variances provided moderate evidence for a main effect of side ( $F_{1,59} = 4.813$ ,  $p = 0.032$ ,  $p\eta^2 = 0.079$ ,  $BF_{10} = 1.202$ ), weak evidence for an interaction ( $F_{1,59} = 3.889$ ,  $p = 0.071$ ,  $p\eta^2 = 0.057$ ,  $BF_{10} = 0.971$ ), and no evidence for a main effect of group ( $F_{1,59} = 2.243$ ,  $p = 0.140$ ,  $p\eta^2 = 0.038$ ,  $BF_{10} = 0.560$ ). This suggests that the spread of map gradients, which is a measure of functional organization, was largely similar across groups.

Lastly, we tested whether there was a circular-linear correlation ( $r_{cl}$ ) between map gradient variability and disease duration. This analysis did not provide evidence for a relation between the (log-transformed) disease duration and the gradient variability of either the affected hand map ( $r_{cl} = 0.395$ ,  $p = 0.310$ ,  $BF_{10} = 0.066$ ) or the unaffected hand map ( $r_{cl} = 0.197$ ,  $p = 0.734$ ,  $BF_{10} = 0.034$ ).

## Discussion

Our study demonstrates that the cortical map of the fingertips of the CRPS hand in S1 is strikingly comparable to the map of the unaffected hand and controls in terms of area, location, orientation, and geometry. Although the area of the map of the affected hand was similar to that of the unaffected hand and controls, we found moderate evidence that it was modulated by disease duration, but neither by pain intensity nor by pain sensitivity: the CRPS hand map was more likely to be smaller in patients who suffered from CRPS for a longer time. Our results do not exclude that other abnormalities may occur at S1 level, such as excitability changes (Lenz et al., 2011; Di Pietro et al., 2013), morphological (Baliki et al., 2011; Pleger et al., 2014; cfr. van Velzen et al., 2016) and connectivity changes (Geha et al., 2008). However, our findings challenge or, at the very least, narrow the notion of S1 map reorganization in CRPS: if any map reorganization occurs, it does not appear to be directly related to pain.

These findings urge us to reconsider the mechanisms underpinning CRPS (Marinus et al., 2011). They also compel us to reevaluate the rationale for (and mechanism of effect of) clinical interventions that aimed to reduce pain by “restoring” somatotopic representations with sensory discrimination training (Moseley et al., 2008a; Catley et al., 2014), or by correcting sensorimotor incongruences (which are thought to be induced by S1 reorganisation) with mirror therapy (McCabe et al., 2003) (but see Moseley and Gandevia, 2005; Moseley et al., 2008a). Although these interventions may offer clinical benefit (O’Connell et al., 2013), they are unlikely to engender a “restoration” of somatotopic representations in S1, given that our results show that S1 maps are preserved in most CRPS patients and are not related to pain intensity.

### ***Revisiting previous evidence of somatotopic reorganisation in CRPS***

Comparisons across different studies are inevitably challenging due to the complexity and variety of CRPS symptomatology: patients vary in regards to the severity of their sensory and motor symptoms; duration of disease; spontaneous pain intensity and treatment history. Our study suggests that the key factor affecting map size is disease duration, which greatly vary across previous studies. Although the demographic composition of our sample was comparable to that of the CRPS UK registry (Shenker et al., 2015), clinical heterogeneity is unavoidable and can contribute to explain the inconsistency of results across studies. Furthermore, it is important to consider methodological issues that affect the validity of previous measures of S1 organization.

The notion of somatotopic reorganisation in CRPS was mostly based on a number of EEG/MEG studies, which measured the Euclidean distance between the loci of S1 activity in response to stimulation of the thumb (d1) and little finger (d5) (Juottonen et al., 2002; Maihofner et al., 2003a; Pleger et al., 2004; Vartiainen et al., 2008; Vartiainen et al., 2009). The majority of these studies did not provide full comparisons with healthy controls; they compared the distance between d1 and d5 of the affected vs unaffected hand in CRPS patients, with only a few studies including comparisons with healthy controls (Pleger et al., 2004; Vartiainen et al., 2008; Vartiainen et al., 2009). These latter studies reported that the cortical distance between d1 and d5 of the affected hand was smaller than that of the unaffected hand (pooled effect estimate: -1.08) and healthy controls (pooled effect estimate: -1.09; see meta-analysis in Di Pietro et al. (2013)). However, the spatial resolution of EEG and MEG is much lower than fMRI and strong a priori assumptions are required to estimate dipole locations (Brett et al., 2002). These issues can affect the accuracy of d1-d5 distance measures.

A more recent fMRI study has followed a similar approach to indirectly estimate the size of S1 representation, by measuring the cortical distance between d1 and d5 activation peaks (Di Pietro et al., 2015). This study partially confirmed former EEG/MEG findings, reporting that the d1-d5 distance in S1 was smaller for the affected hand than it was for the unaffected hand in CRPS patients. However, the representation of the affected hand was comparable to that of healthy controls, in agreement with what we found. Critically,



the representation of the unaffected hand in CRPS patients was larger than that of controls, thus challenging the view that the representation of the affected hand is shrunk and suggesting that the representation of the unaffected hand is actually enlarged. Our results do not support this interpretation.

A point of strength of the study by Di Pietro et al. (2015) is the use of a blinded approach to analyses, also a characteristic of our study. However, three important limitations affect all previous studies including the Di Pietro et al (2015) study, independently of their imaging method. First, the approach taken to estimate map size is both indirect and incomplete, because it is based on measurement of the Euclidean *distance* between the activation maxima of two fingers (d1 and d5). A more direct and complete method to assess map size is to calculate the *area* of the map of all fingers. Second, Euclidean measures of cortical distances can be inaccurate because they disregard that the cortical surface is not flat, especially in the regions of the sulci. Third, Euclidean distance measures can be affected by morphological changes in S1, that can be associated with CRPS (Baliki et al., 2011; Pleger et al., 2014). The latter two problems can be overcome by morphing activation maps onto a reconstruction of the flattened cortical surface (Makin et al., 2013a; Kikkert et al., 2016), but previous studies on CRPS patients have not taken this approach. Altogether, these methodological issues can affect both the accuracy and validity of previous measures of map extent.

### ***Interpreting map differences: are they really due to plasticity?***

Beside methodological issues, a perhaps even more important matter is how a putative difference in map size or geometry is interpreted. Too often, a reduction of the cortical distance between d1-d5 has been interpreted as the hallmark of cortical *plasticity*. Given that it was shown to correlate with pain levels (finding not replicated by this study), it was proposed that such plastic changes were likely to be maladaptive (Maihofner et al., 2003b, 2004). Cortical plasticity, or neuroplasticity, is defined as the ability of the brain to *change* over time. Therefore, to be confident that the differences observed in neural measures are truly due to plasticity, it would be necessary to compare identical measures of the same neuronal activity at different stages of disease progression. Most previous studies, including ours, were cross-sectional: they can inform about differences, but not plasticity. To the best of our knowledge, only one previous study (Maihofner et al., 2004) investigated changes of S1 organization over time (specifically, after treatment), but results of that study should be interpreted with caution due to the methodological problems discussed above.

It is actually not possible, in studies on S1 organization in neuropathic pain conditions, to compare measures of the *same* neuronal activity over time, due to the disease pathophysiology. Chronic pain involves the engagement of highly plastic molecules that alter the properties of peripheral neurons and spinal circuits, leading to sensitization (Basbaum et al., 2009). As a consequence, in chronic CRPS, the same innocuous mechanical stimulus activates different peripheral and spinal neurons, depending on

where it is delivered. Touch to the affected body part can activate spinal nociceptive circuits and result in allodynia (Peirs et al., 2015), whereas touch to the healthy body part only activates spinal mechanoreceptive pathways. These different spinal neurons project to different neurons in S1 (Kenshalo et al., 2000). Although the spatial arrangement of S1 neurons activated by nociceptive input is quite similar to that of S1 neurons that respond to non-noxious mechanical input (on healthy skin), some differences due to receptor density and cortical magnification are expected (Kenshalo and Isensee, 1983; Kenshalo et al., 2000; Mancini et al., 2012; Mancini et al., 2013; Mancini et al., 2014). Any difference that might exist between the cortical maps of the affected vs unaffected body parts might simply reflect a difference in the afferent neural populations that respond to the mechanical stimulation: in other words, it can denote peripheral plasticity but it does not necessarily imply cortical plasticity.

### ***Stability of cortical topographies***

Keeping these interpretative issues in mind, recent fMRI studies (Makin et al., 2013a; Kikkert et al., 2016) have shown that finger topographies in S1 are surprisingly persistent even in humans who suffered amputation of the upper-limb. It was demonstrated that the area, location and functional organisation of the S1 maps of the missing hand were similar, although noisier, to those observed in controls during finger movements (Makin et al., 2013a; Kikkert et al., 2016). It has also been shown that the deafferented territory in human S1 can respond to body regions that the amputees overuse to supplement lost hand function (mainly the intact hand), resulting in a highly idiosyncratic remapping which does not necessarily involve adjacent representations in S1 (Makin et al., 2013b; Philip and Frey, 2014). Thus, cortical reorganisation in amputees is not dictated by cortical topographies, but seems to depend on compensatory use of other body parts. Similarly, short-term shifts in S1 maps can occur in healthy participants after surgical gluing of the index and middle fingers for 24 hours. These changes are thought to depend on compensatory use of the fourth and fifth fingers (Kolasinski et al., 2016b). These studies support the view that any S1 change previously reported in CRPS patients are not directly related to pain, but might be primarily related to hand use. Some evidence in support of this idea comes from an fMRI study of finger movements in CRPS patients, which reported substantial reorganization in central motor circuits that correlated with motor impairment (Maihofner et al., 2007).

Furthermore, recent evidence from electrophysiological and inactivation studies in monkeys suggests that the reorganisation following nerve transection originates, not in S1, but in the brainstem. Indeed, inactivating the cuneate nucleus abolishes the neural activity in the deafferented limb representation in S1 elicited by face stimulation (Kambi et al., 2014). Hence, loss of input from a body region in adulthood may lead to the formation or potentiation of lateral connections in the brainstem, which gives rise to a new pathway from periphery to cortex. It is not clear whether this new pathway contributes to cortical reorganisation, but the original pathway seems to be relatively

spared even under the extreme circumstance of limb amputation (Makin and Bensmaia, 2017).

Some resistance to change has also been described for visual retinotopic maps. Although it has been shown that large lesions to the retina in adult mammals can induce a reorganization of retinotopic cortical maps in primary visual cortex (Kaas et al., 1990), more recent studies have reported that the topography of the macaque primary visual cortex does not change (for at least seven months) following binocular retinal lesions (Smirnakis et al., 2005). Similarly, severe eye diseases such as retinal degeneration do not seem to affect retinotopic representations in the human early visual cortex (Xie et al., 2012; Haak et al., 2016). Altogether, these findings suggest that cortical topography is more stable and resistant to change than what it was initially thought.

## Conclusion

Our study provides the most complete characterization, to date, of the S1 somatotopy of the CRPS hand. We report that the S1 representation of the CRPS hand is comparable to that of the healthy hand, in terms of cortical area, location and geometry. The area of the S1 map of the CRPS hand is modulated by disease duration but neither by pain intensity nor pain sensitivity. These results urge us to reconsider the mechanisms of cortical reorganization in CRPS, as well as the rationale for interventions that aim to restore the S1 topography in CRPS patients.

## Materials and Methods

**Participants.** We recruited 20 adults with unilateral CRPS to the upper limb and 20 healthy controls (HC) matched for age, gender and handedness. Each participant gave written informed consent to take part in the study. All experimental procedures were carried out in accordance with the Declaration of Helsinki and approved by both the Human Research Ethics Committee of the University of New South Wales (HC13214) and by the Human Ethics Committee of the South Eastern Local Health District (HREC 10/051). Inclusion criteria for control participants were: (1) pain-free at that time of the study; (2) no prior history of a significant chronic pain, psychiatric or medical disorder; (3) no history of substance abuse. Inclusion criteria for CRPS patients were: (1) a diagnosis of unilateral CRPS to the upper limb or hand according to the Budapest research criteria (Harden et al., 2010); (2) CRPS duration greater than 3 months; (3) no history of substance abuse and no psychiatric-comorbidities. All participants were fluent in English language. Five of 40 participants were excluded from the study due to the following problems: MRI scanner failure (subject #31) or acquisition problems (#13, #15, #32) and a control participant reported pain to the wrist on the day of scan (a median nerve compression was subsequently diagnosed, #42). The demographic and clinical information of the remaining sample (Controls:  $n = 17$ ; CRPS to the left hand:  $n = 8$ ; CRPS to the right hand:  $n = 10$ ) is reported in Table 1.

**Clinical evaluation.** Patients were clinically evaluated according to the Budapest research criteria (Harden et al., 2010) by a blinded assessor of the research team on the first session of the study to confirm that the research criteria were met. As part of the clinical and diagnostic assessment of CRPS, we assessed pressure pain thresholds (PPT; kg/cm<sup>2</sup>) using a digital pressure algometer (Wagner instrument, Greenwich, USA) on two sites of each hand: the thenar eminence and the third proximal interphalangeal joint. Pain intensity was also rated using an 11-points Likert scale, where 0 corresponded to “no pain” and 10 indicated “the worst pain imaginable, like a red hot poker through your eye”. The intensity of spontaneous pain in the upper limb was rated in all patients immediately before, during and after the imaging session. Two control participants reported discomfort and mild to moderate postural pain to the upper limb during the scanning session (Table 1).

**Stimuli and procedure.** Each participant laid supine inside the scanner bore with both hands palm upwards. Participant’s arms and hands were propped with cushions and pads to minimise movements. The stimulus consisted of periodic stimulation of the fingertips of both hands. In each stimulation cycle, the tips of the index, middle, ring, and little fingers were successively stimulated using a customised polypropylene probe with a rounded tip. Each fingertip was stimulated for 6 s, and each cycle (four fingers x 6 s = 24 s) was interleaved by 6 s of rest. Twelve cycles were administered in each of the four consecutive functional runs. To reduce scanning time, two trained experimenters stimulated the tips of homologous fingers of the right and left hands simultaneously. The experimenters received auditory cues through headphones, synchronising the location and timing of each stimulus. The thumb was not stimulated to reduce scanning time and due to practical difficulties in stimulating the thumb in succession to the other fingertips (patients could not keep the hand open flat for prolonged periods of time).

**MRI acquisition.** Echoplanar images (1.5 mm<sup>3</sup> isotropic resolution, 183 volumes/run, 32 axial slices, flip angle = 82°, TR = 2s) were collected in four runs on a Philips Achieva TX 3T MRI scanner using a 32-channel head coil. FreeSurfer (<https://surfer.nmr.mgh.harvard.edu/>) was used to reconstruct the cortical surface for each subject from a structural T1 image (0.727x0.727 mm<sup>2</sup> in-plane, 0.75 mm thick slices, 250 slices, flip angle = 8°, TR = 6.318 ms). In four subjects (28, 29, 33, 34), structural T1 images were corrected for non-uniform intensity using the AFNI’s tool ‘3dUnifize’ (<https://afni.nimh.nih.gov/>), before surface reconstruction, because these images contained shading artefacts that could have affected segmentation.

**First-level MRI analyses.** All first-level analyses were performed by a researcher (FM) blinded to the group condition (right CRPS, left CRPS, control). The first 3 volumes from EPIs were discarded from all analyses. Functional series were aligned and motion-corrected using the AFNI program ‘3dvolreg’. Using this as a starting point, functional-to-high resolution alignment was then refined using manual blink comparison using an adaptation of Freesurfer’s TkRegister implemented in csurf (<http://www.cogsci.ucsd.edu/~sereno/~sereno/tmp/dist/csurf/>). After linear trend removal, aligned

data from the four runs were raw-averaged, and then analysed using a fast Fourier transform, computed for the time series at each voxel fraction (vertex): this resulted in complex-valued signals with the phase angle and magnitude of the BOLD response at each voxel. Both Fourier and statistical analysis were performed using *csurf*. No spatial smoothing was performed before statistical analyses. Very low temporal frequencies and harmonics (< 0.005 Hz) were excluded because movement artefacts dominate responses at these frequencies, a procedure virtually identical to regressing out signals correlated with low frequency movements. High frequencies up to the Nyquist limit were allowed (i.e., half the sampling rate); this corresponds to no use of low pass filter. For display, a vector was generated whose amplitude is the square root of the F-ratio calculated by comparing the signal amplitude at the stimulus frequency to the signal at other noise frequencies and whose angle was the stimulus phase. To minimize the effect of superficial veins on BOLD signal change, superficial points along the surface normal to each vertex (top 20% of the cortical thickness) were disregarded.

The F-ratio was subsequently corrected at  $p < 0.01$  using a surface-based cluster correction for multiple comparisons as implemented by *surfclust* and *randsurfclust* within the *csurf* FreeSurfer framework (Hagler et al., 2006). The Fourier-transformed data were then sampled onto the individual cortical surface. Using this statistical threshold, we cut a label containing all vertices that showed a significant periodic response to finger stimulation (see one example in Figure 6A) and was localised within S1 (i.e., within the boundaries of areas 3a, 3b, 1, and 2, as estimated by the cortical parcellation tools implemented in *Freesurfer*). This label, or region of interest (ROI), is used as the input for the analyses described in the next sections.

In a few cases, we could not identify any ROI with a response to fingertip stimulation (no response to either fingertip stimulation), even at uncorrected  $p < 0.05$ : subject #3, right hemisphere (patient with right CRPS); subject #20, left hemisphere (right CRPS); subject #24, left hemisphere (right CRPS); subject #28, left hemisphere (left CRPS); subject #29, right hemisphere (left CRPS). These cases were excluded from further analysis.

***Evaluation of hand map area.*** We calculated the surface area of the left- and right-hand maps, from each participant ROI. This was done after resampling the phase maps onto the original average brain volume, to control for inter-individual variability in brain size. To increase statistical power, we pooled data from the two CRPS groups and compared map area in the affected vs unaffected sides with both a frequentist and a Bayesian mixed-effects ANOVAs with a within-subject factor 'side' (2-levels: affected, unaffected) and a between-subjects factor 'group' (2-levels: controls, CRPS). In the CRPS group, we tested whether the area of the maps of the affected and unaffected hands could be explained using first-order polynomials, second-order polynomials, and Bayesian linear regression models by the following variables: (1) CRPS duration; (2) pain intensity rating collected during the imaging session; (3) a severity score derived from the difference of PPT thresholds in the two hands as follows:

(1)

$$PP_{\text{severity}} = [ (PPT_{\text{unaffected hand}} - PPT_{\text{affected hand}}) / PPT_{\text{unaffected hand}} ] 100$$

**Evaluation of hand map location.** To compare the location of hand maps among different people, it is important to control for individual differences in brain morphology. Therefore, we first inflated each participant's cortical surface to a sphere, and then non-linearly morphed it into alignment with an average spherical cortical surface using FreeSurfer's tool `mri_surf2surf` (Fischl et al., 1999). This procedure maximizes alignment between sulci (including the central sulcus), while minimizing metric distortions across the surface. We then resampled phase maps onto this average spherical surface (FreeSurfer's `fsaverage`) and calculated the location of the centroid of the map on this average surface. We statistically compared the locations of map centroids across groups in two ways.

First, we tested whether the distribution of spherical coordinates was different across conditions ('side' and 'group'). As a basis for this comparison, we used the Fisher probability density function (Fisher, 1953), which is the spherical coordinate system analogue of the Gaussian probability density function. This approach has been commonly used in the field of paleomagnetism, and has also been applied for the analysis of direction data from diffusion tensor imaging (Hutchinson et al., 2012). We calculated the F statistics for the null hypothesis that sample observations from two groups are taken from the same population. The following equation was derived from Watson (Watson, 1956; Hutchinson et al., 2012) and used to compare two groups with  $N_1$  and  $N_2$  observed unit vectors and resultant vectors of length  $R_1$  and  $R_2$  respectively:

$$F_{2,2(N-2)} = (N - 2) \frac{(R_1 + R_2 - R)}{(N - R_1 - R_2)} \quad (2)$$

where  $N = N_1 + N_2$  and  $R$  is the length of the resultant vector for the pooled direction vector observations from both groups. The resultant vector sums of all observations,  $R_1$ ,  $R_2$ , and  $R$ , are calculated as follows:

$$R = \sqrt{\left(\sum_{i=1}^N x_i\right)^2 + \left(\sum_{i=1}^N y_i\right)^2 + \left(\sum_{i=1}^N z_i\right)^2} \quad (3)$$

where  $x_i$ ,  $y_i$ ,  $z_i$  are the coordinates of the map centroids for each participant.

We performed the following F contrasts, separately for each hemisphere: controls vs patients with right CRPS and controls vs patients with left CRPS (four F tests in total). The larger the value of F, the more different the two group mean directions. A p-value was obtained using the appropriate degrees of freedom (2 and  $2(N-2)$ , respectively) and critical probability level of 0.05. The F statistics for  $H_0$  (no difference) and  $H_1$  was used to calculate the BF for each contrast, as follows (Held and Ott, 2018, equation 5):

(4)

$$BF_{(F)} = \frac{f_F(F(p)|H_0)}{f_F(F(p)|H_1)}$$

The F-based  $BF_{10}$  is simply equal to  $1/BF_{(F)}$ .

As a complementary measure of map location, we computed the geodesic distance, in mm, between the map centroid and an arbitrary reference point located within the concavity of the central sulcus (displayed in Figure 5C). Geodesic distances were statistically compared using both a frequentist and a Bayesian mixed-effects ANOVA with a within-subject factor ‘side’ (2-levels: affected, unaffected) and a between-subjects factor ‘group’ (2-levels: controls, CRPS).

***Evaluation of hand map geometry.*** As a measure of the functional geometry of the map, we measured the spatial arrangement (i.e., direction) of the spatial gradients of the map. As illustrated in Figure 6A, the hand map exhibits a typical spatial gradient from index finger to little finger. For each participant, we resampled the map ROIs from the inflated cortical surface of each participant onto a flattened, two-dimensional, surface patch. After sampling the complex-valued 3D phase-mapping data to the folded surface, we displayed it on a small flattened, 2D surface patch, which minimizes deviations from original geometry. We gently smoothed the complex values on the surface using a 1.5 mm kernel and then converted the complex-valued data (real, imaginary) to amplitude and phase angle. The 2D gradient of the phase angle was computed after fitting a plane to the data from the surrounding vertices (taking care to circularly subtract the angular data). The amplitude of the gradient at each vertex was then normalized for display.

The mean direction of map gradients is not informative because each participant cortical patch has an arbitrary direction. However, the spread (or variability) of map gradients is informative, because it doesn’t depend on the orientation of the cortical surface patch; higher variability of gradient directions would indicate that the map phases are more spread and less spatially organized. Therefore, we investigated whether the functional geometry of the map is affected by CRPS, by testing whether the gradient directions of the map of the affected hand were more variable than those of the unaffected hand and controls. As a measure of map gradient variability, we calculated the circular variance of the gradient angles of each ROI. To statistically compare the variability of map gradients across groups and participants, we conducted a Harrison-Kanji test (Harrison and Kanji, 1988; Berens, 2009) on the gradient variances. This test allowed us to perform a two-factor ANOVA for circular data, with a within-subject factor ‘side’ (2-levels: affected, unaffected) and a between-subjects factor ‘group’ (2-levels: controls, CRPS). BFs for each contrast were calculated as described by equation 4 (the probability level for  $H_0$  was 0.05).

We tested the hypothesis that there was a relation between map gradient variability and disease duration, using the equation for circular-linear correlation ( $r_{cl}$ ) described in (Zar, 1999: equation 27.47). A p-value for  $r_{cl}$  is computed by considering the test statistic  $N r_{cl}$ ,

which follows a  $\chi^2$  distribution with two degrees of freedom (Berens, 2009). BFs based on the  $\chi^2$  distribution were calculated following equation 4 (with 0.05 probability level for  $H_0$ ).

**Cross-subject average (for illustration).** We averaged maps across subjects purely for illustration. All statistical analyses were performed on measures derived from the individual-subjects maps. We first inflated each participant's cortical surface to a sphere, and then non-linearly morphed it into alignment with an average spherical cortical surface using FreeSurfer's tool `mri_surf2surf` (Fischl et al., 1999). This procedure maximizes alignment between sulci (including the central sulcus), while minimizing metric distortions across the surface. Four steps of nearest-neighbour smoothing (<1.5 mm FWHM in 2D) were applied to the data after resampling on the spherical surface. Complex-valued mapping signals were then combined across all subjects (independently of whether the S1 map was detected or not) on a vertex-by-vertex basis by vector averaging (Mancini et al., 2012). The amplitude was normalized to 1, which prevented overrepresenting subjects with strong amplitudes. Finally, a scalar cross-subject F-ratio was calculated from the complex data and rendered back onto 'fsaverage' (uncorrected,  $p < 0.05$ ).

## Software and Data Availability

Software to perform phase-mapping analyses is openly available at <http://www.cogsci.ucsd.edu/~sereno/tmp/dist/csurf>. We used an open-source software (JASP) for the Bayesian statistical analyses: <https://jasp-stats.org>. Raw data are freely available at <OSF link to be disclosed upon acceptance>. Processed data that support the findings of this study are available from the corresponding author, upon reasonable request.

## Figure captions

**Figure 1.** (A) *Phase-encoded stimulation procedure.* The tip of the index finger (red, d2), middle finger (green, d3), ring finger (blue, d4), little finger (yellow, d5) were stimulated in succession, in repeated cycles (12 cycles per run). To reduce scanning time, the homologous fingers of the right and left hands were stimulated simultaneously. (B) *Illustrative phase-encoded response to periodic fingertip stimulation.* The figure shows the raw Blood-Oxygen-Level-Dependent (BOLD) response in four voxels of interest (thin lines; data were motion-corrected and the linear trend removed). The locations of the voxels are marked with a star on the cortical surface of the left primary somatosensory cortex of one participant. The thicker lines represent the average of the raw BOLD response across 12 cycles of stimulation. The transversal, dashed, white line is displayed to facilitate the visualization of the shift of the phase of the BOLD response across the four voxels. The F-statistics of the signal at different phases are rendered on the inflated cortical surface and color-coded as in panel A (cluster-corrected  $p < 0.01$ ). Phases corresponding to rest have been truncated.



**Figure 2.** *Phase maps of the hand in an illustrative control participant and three CRPS patients.* The color-coding scheme used is shown on the top of the figure and is the same as in Figure 1: red = d2, green = d3, blue = d4, yellow = d5. Phases corresponding to rest have been truncated. Statistical thresholding and cluster correction at  $p < 0.01$  was applied to each individual-participant data. CS: central sulcus. The star symbol denotes the map of the CRPS hand.

**Figure 3.** *Surface-based average of phase maps in controls, patients with CRPS to the right hand, and patients with CRPS to the left hand.* The complex-valued mapping data were averaged in a spherical surface coordinate system after morphing each subject's data into alignment with an average spherical sulcal pattern, and the F-statistics were rendered back onto an average unfolded cortical surface (Freesurfer's fsaverage, 'inflated\_average'; uncorrected  $p < 0.05$  only for illustration). The color-coding scheme used is shown on the top of the figure and is the same as in Figures 1-2: red = d2, green = d3, blue = d4, yellow = d5. Phases corresponding to rest have been truncated. CS: central sulcus; PoCS: post-central sulcus.

**Figure 4.** (A) *Area of the hand map in S1.* The area of the hand map ( $\text{mm}^2$ ) in the left hemisphere and right hemisphere is plotted for each group and individual participant. To facilitate comparison, data from the two CRPS groups (right hand CRPS, left hand CRPS) were pooled, after flipping the data from one group (right hand CRPS) so that the affected side is the left hand/right hemisphere in all patients. (B) *No relation between map area and CRPS duration.* The top plot shows the lack of relation between the S1 map of the healthy hand and CRPS duration, whereas the bottom plot shows the weak (not significant) relation between the S1 map of the affected hand and disease duration.

**Figure 5.** (A-B) *Spatial distribution of map centroids.* The location of the centroid of the hand map in each individual subject is displayed on an average spherical cortical surface. An arbitrary reference point on the central sulcus is marked with a white cross. (C) *Geodesic distance (mm) between each map centroid and a reference point ('+') on the central sulcus.* To facilitate comparison, data from the two CRPS groups (right hand CRPS, left hand CRPS) were pooled, after flipping the data from one group (right hand CRPS) so that the affected side is the left hand/right hemisphere in all patients.

**Figure 6.** (A) *Gradients of the hand map.* Gradients of a single-subject phase map are displayed as cyan arrows over a flattened (2D) cortical surface patch. The gradient points in the direction of the greatest rate of increase of the function (i.e., the direction of the phase shift in the hand map). The color-coding scheme of the hand map is the same as in Figures 1-3: red = d2, green = d3, blue = d4, yellow = d5. (B) *Variability of hand map gradients.* The circular variance of map gradient directions is displayed for each participant and condition (side: left hemisphere, right hemisphere; group: controls, CRPS patients). The color-coding scheme for panel B is shown at the bottom of the figure. To facilitate comparison, data from the two CRPS groups (right hand CRPS, left hand

CRPS) were pooled, after flipping the data from one group (right hand CRPS) so that the affected side is the left hand/right hemisphere in all patients.

### **Author contributions**

FM, APW, MMS, JHM, GDI, MIS, LGM, CR conceived and designed the study. AW, MMS, ZJI collected the data. FM analysed the data. FM, MIS, LGM, CR wrote the manuscript.

### **Acknowledgments**

We acknowledge the support of the Australian National Imaging Facility and are grateful to Dr Michael Green and to the staff of NeuRA Imaging. FM and GDI were supported by a Wellcome Trust Strategic Award (COLL JLARAXR). GDI was additionally supported by a ERC Consolidator Grant (PAINSTRAT). APW was supported by educational grants from the Australian Pain Society/Australian Pain Relief Association, Mundipharma (PhD Scholar #3) and NeuRA. GLM was supported by a research fellowship from the National Health and Medical Research Council (NHMRC) of Australia (ID 1061279). This study was supported by a project grant from the NHMRC (ID 630431).

### **Potential conflicts of interest**

Dr Mancini reports grants from EFIC Grunenthal, outside the submitted work. Dr Wang reports grants from Mundipharma and Australian Pain Society/Australian Pain Relief Association, during the conduct of the study. LGM receives royalties from books on pain, CRPS and rehabilitation and speaker's fees for lectures on pain, performance and rehabilitation, outside the submitted work. He has also received support from Pfizer, Workers' Compensation Boards in Australia, Europe and North America, AIA Australia, the International Olympic Committee, Port Adelaide Football Club and Arsenal Football Club, outside the submitted work. No other author states any conflict of interest.

## References

- Baliki MN, Schnitzer TJ, Bauer WR, Apkarian AV (2011) Brain morphological signatures for chronic pain. *PLoS One* 6:e26010.
- Basbaum AI, Bautista DM, Scherrer G, Julius D (2009) Cellular and molecular mechanisms of pain. *Cell* 139:267-284.
- Berens P (2009) CircStat: A MATLAB toolbox for circular statistics. *J Stat Soft* 31:1-21.
- Besle J, Sanchez-Panchuelo RM, Bowtell R, Francis S, Schluppeck D (2013) Single-subject fMRI mapping at 7 T of the representation of fingertips in S1: a comparison of event-related and phase-encoding designs. *J Neurophysiol* 109:2293-2305.
- Brett M, Johnsrude IS, Owen AM (2002) The problem of functional localization in the human brain. *Nat Rev Neurosci* 3:243-249.
- Catley MJ, O'Connell NE, Berryman C, Ayhan FF, Moseley GL (2014) Is tactile acuity altered in people with chronic pain? a systematic review and meta-analysis. *J Pain* 15:985-1000.
- Chen CF, Kreutz-Delgado K, Sereno MI, Huang RS (2017) Validation of periodic fMRI signals in response to wearable tactile stimulation. *Neuroimage* 150:99-111.
- Di Pietro F, Stanton TR, Moseley GL, Lotze M, McAuley JH (2015) Interhemispheric somatosensory differences in chronic pain reflect abnormality of the healthy side. *Hum Brain Mapp* 36:508-518.
- Di Pietro F, Stanton TR, Moseley GL, Lotze M, McAuley JH (2016) An exploration into the cortical reorganisation of the healthy hand in upper-limb complex regional pain syndrome. *Scand J Pain* 13:18-24.
- Di Pietro F, McAuley JH, Parkitny L, Lotze M, Wand BM, Moseley GL, Stanton TR (2013) Primary somatosensory cortex function in complex regional pain syndrome: a systematic review and meta-analysis. *J Pain* 14:1001-1018.
- Fischl B, Sereno MI, Dale AM (1999) Cortical surface-based analysis. II: Inflation, flattening, and a surface-based coordinate system. *NeuroImage* 9:195-207.
- Fisher R (1953) Dispersion on a Sphere. *Proc R Soc Lon Ser-A* 217:295-305.
- Geha PY, Baliki MN, Harden RN, Bauer WR, Parrish TB, Apkarian AV (2008) The brain in chronic CRPS pain: abnormal gray-white matter interactions in emotional and autonomic regions. *Neuron* 60:570-581.
- Haak KV, Morland AB, Rubin GS, Cornelissen FW (2016) Preserved retinotopic brain connectivity in macular degeneration. *Ophthalmic Physiol Opt* 36:335-343.
- Hagler DJ, Jr., Saygin AP, Sereno MI (2006) Smoothing and cluster thresholding for cortical surface-based group analysis of fMRI data. *NeuroImage* 33:1093-1103.
- Harden RN, Bruehl S, Perez RS, Birklein F, Marinus J, Maihofner C, Lubenow T, Buvanendran A, Mackey S, Graciosa J, Mogilevski M, Ramsden C, Chont M, Vatine JJ (2010) Validation of proposed diagnostic criteria (the "Budapest Criteria") for Complex Regional Pain Syndrome. *Pain* 150:268-274.
- Harrison D, Kanji GK (1988) The development of analysis of variance for circular data. *Journal of Applied Statistics* 15:197.

- Held L, Ott M (2018) On p-Values and Bayes Factors. *Annual Review of Statistics and Its Application* 5:393-419.
- Hutchinson EB, Rutecki PA, Alexander AL, Sutula TP (2012) Fisher statistics for analysis of diffusion tensor directional information. *J Neurosci Methods* 206:40-45.
- Juottonen K, Gockel M, Silen T, Hurri H, Hari R, Forss N (2002) Altered central sensorimotor processing in patients with complex regional pain syndrome. *Pain* 98:315-323.
- Kaas JH, Krubitzer LA, Chino YM, Langston AL, Polley EH, Blair N (1990) Reorganization of retinotopic cortical maps in adult mammals after lesions of the retina. *Science* 248:229-231.
- Kambi N, Halder P, Rajan R, Arora V, Chand P, Arora M, Jain N (2014) Large-scale reorganization of the somatosensory cortex following spinal cord injuries is due to brainstem plasticity. *Nat Commun* 5:3602.
- Kenshalo DR, Iwata K, Sholas M, Thomas DA (2000) Response properties and organization of nociceptive neurons in area 1 of monkey primary somatosensory cortex. *J Neurophysiol* 84:719-729.
- Kenshalo DR, Jr., Isensee O (1983) Responses of primate SI cortical neurons to noxious stimuli. *J Neurophysiol* 50:1479-1496.
- Kikkert S, Kolasinski J, Jbabdi S, Tracey I, Beckmann CF, Johansen-Berg H, Makin TR (2016) Revealing the neural fingerprints of a missing hand. *Elife* 5.
- Kolasinski J, Makin TR, Jbabdi S, Clare S, Stagg CJ, Johansen-Berg H (2016a) Investigating the Stability of Fine-Grain Digit Somatotopy in Individual Human Participants. *J Neurosci* 36:1113-1127.
- Kolasinski J, Makin TR, Logan JP, Jbabdi S, Clare S, Stagg CJ, Johansen-Berg H (2016b) Perceptually relevant remapping of human somatotopy in 24 hours. *Elife* 5.
- Lenz M, Hoffken O, Stude P, Lissek S, Schwenkreis P, Reinersmann A, Frettlow J, Richter H, Tegenthoff M, Maier C (2011) Bilateral somatosensory cortex disinhibition in complex regional pain syndrome type I. *Neurology* 77:1096-1101.
- Maihofner C, Handwerker HO, Neundorfer B, Birklein F (2003a) Patterns of cortical reorganization in complex regional pain syndrome. *Neurology* 61:1707-1715.
- Maihofner C, Handwerker HO, Neundorfer B, Birklein F (2003b) Patterns of cortical reorganization in complex regional pain syndrome. *Neurology* 61:1707-1715.
- Maihofner C, Handwerker HO, Neundorfer B, Birklein F (2004) Cortical reorganization during recovery from complex regional pain syndrome. *Neurology* 63:693-701.
- Maihofner C, Baron R, DeCol R, Binder A, Birklein F, Deuschl G, Handwerker HO, Schattschneider J (2007) The motor system shows adaptive changes in complex regional pain syndrome. *Brain* 130:2671-2687.
- Makin TR, Bensmaia SJ (2017) Stability of Sensory Topographies in Adult Cortex. *Trends Cogn Sci* 21:195-204.

- Makin TR, Scholz J, Filippini N, Henderson Slater D, Tracey I, Johansen-Berg H (2013a) Phantom pain is associated with preserved structure and function in the former hand area. *Nat Commun* 4:1570.
- Makin TR, Cramer AO, Scholz J, Hahamy A, Henderson Slater D, Tracey I, Johansen-Berg H (2013b) Deprivation-related and use-dependent plasticity go hand in hand. *Elife* 2:e01273.
- Mancini F, Haggard P, Iannetti GD, Longo MR, Sereno MI (2012) Fine-grained nociceptive maps in primary somatosensory cortex. *Journal of Neuroscience* 32:17155-17162.
- Mancini F, Sambo CF, Ramirez JD, Bennett DL, Haggard P, Iannetti GD (2013) A fovea for pain at the fingertips. *Curr Biol* 23:496-500.
- Mancini F, Bauleo A, Cole J, Lui F, Porro CA, Haggard P, Iannetti GD (2014) Whole-body mapping of spatial acuity for pain and touch. *Ann Neurol* 75:917-924.
- Marinus J, Moseley GL, Birklein F, Baron R, Maihofner C, Kingery WS, van Hilten JJ (2011) Clinical features and pathophysiology of complex regional pain syndrome. *Lancet Neurology* 10:637-648.
- Martuzzi R, van der Zwaag W, Farthouat J, Gruetter R, Blanke O (2014) Human finger somatotopy in areas 3b, 1, and 2: a 7T fMRI study using a natural stimulus. *Hum Brain Mapp* 35:213-226.
- McCabe CS, Haigh RC, Ring EF, Halligan PW, Wall PD, Blake DR (2003) A controlled pilot study of the utility of mirror visual feedback in the treatment of complex regional pain syndrome (type 1). *Rheumatology (Oxford)* 42:97-101.
- Moseley GL, Gandevia SC (2005) Sensory-motor incongruence and reports of 'pain'. *Rheumatology (Oxford)* 44:1083-1085.
- Moseley GL, Gallace A, Spence C (2008a) Is mirror therapy all it is cracked up to be? Current evidence and future directions. *Pain* 138:7-10.
- Moseley GL, Zalucki NM, Wiech K (2008b) Tactile discrimination, but not tactile stimulation alone, reduces chronic limb pain. *Pain* 137:600-608.
- O'Connell NE, Wand BM, McAuley J, Marston L, Moseley GL (2013) Interventions for treating pain and disability in adults with complex regional pain syndrome. *Cochrane Database Syst Rev*:CD009416.
- Oldfield RC (1971) The assessment and analysis of handedness: the Edinburgh inventory. *Neuropsychologia* 9:97-113.
- Peirs C, Williams SP, Zhao X, Walsh CE, Gedeon JY, Cagle NE, Goldring AC, Hioki H, Liu Z, Marell PS, Seal RP (2015) Dorsal Horn Circuits for Persistent Mechanical Pain. *Neuron* 87:797-812.
- Philip BA, Frey SH (2014) Compensatory changes accompanying chronic forced use of the nondominant hand by unilateral amputees. *J Neurosci* 34:3622-3631.
- Pleger B, Draganski B, Schwenkreis P, Lenz M, Nicolas V, Maier C, Tegenthoff M (2014) Complex regional pain syndrome type I affects brain structure in prefrontal and motor cortex. *PLoS ONE* 9:e85372.
- Pleger B, Tegenthoff M, Ragert P, Forster AF, Dinse HR, Schwenkreis P, Nicolas V, Maier C (2005) Sensorimotor retuning [corrected] in complex regional pain syndrome parallels pain reduction. *Ann Neurol* 57:425-429.
- Pleger B, Tegenthoff M, Schwenkreis P, Janssen F, Ragert P, Dinse HR, Volker B, Zenz M, Maier C (2004) Mean sustained pain levels are linked to hemispherical

- side-to-side differences of primary somatosensory cortex in the complex regional pain syndrome I. *Experimental Brain Research* 155:115-119.
- Sanchez-Panchuelo RM, Francis S, Bowtell R, Schluppeck D (2010) Mapping human somatosensory cortex in individual subjects with 7T functional MRI. *J Neurophysiol* 103:2544-2556.
- Sanchez-Panchuelo RM, Besle J, Beckett A, Bowtell R, Schluppeck D, Francis S (2012) Within-digit functional parcellation of Brodmann areas of the human primary somatosensory cortex using functional magnetic resonance imaging at 7 tesla. *J Neurosci* 32:15815-15822.
- Sereno MI, Huang RS (2014) Multisensory maps in parietal cortex. *Curr Opin Neurobiol* 24:39-46.
- Sereno MI, Dale AM, Reppas JB, Kwong KK, Belliveau JW, Brady TJ, Rosen BR, Tootell RB (1995) Borders of multiple visual areas in humans revealed by functional magnetic resonance imaging. *Science* 268:889-893.
- Shenker N, Goebel A, Rockett M, Batchelor J, Jones GT, Parker R, de CWAC, McCabe C (2015) Establishing the characteristics for patients with chronic Complex Regional Pain Syndrome: the value of the CRPS-UK Registry. *Br J Pain* 9:122-128.
- Silver MA, Kastner S (2009) Topographic maps in human frontal and parietal cortex. *Trends Cogn Sci* 13:488-495.
- Smart KM, Wand BM, O'Connell NE (2016) Physiotherapy for pain and disability in adults with complex regional pain syndrome (CRPS) types I and II. *Cochrane Database Syst Rev* 2:CD010853.
- Smirnakis SM, Brewer AA, Schmid MC, Tolia AS, Schuz A, Augath M, Inhoffen W, Wandell BA, Logothetis NK (2005) Lack of long-term cortical reorganization after macaque retinal lesions. *Nature* 435:300-307.
- van Velzen GA, Rombouts SA, van Buchem MA, Marinus J, van Hilten JJ (2016) Is the brain of complex regional pain syndrome patients truly different? *Eur J Pain* 20:1622-1633.
- Vartiainen N, Kirveskari E, Kallio-Laine K, Kalso E, Forss N (2009) Cortical reorganization in primary somatosensory cortex in patients with unilateral chronic pain. *J Pain* 10:854-859.
- Vartiainen NV, Kirveskari E, Forss N (2008) Central processing of tactile and nociceptive stimuli in complex regional pain syndrome. *Clin Neurophysiol* 119:2380-2388.
- Watson G (1956) Analysis of dispersion on a sphere. *Geophysical Journal International* 7:153-159.
- Xie J, Wang GJ, Yow L, Humayun MS, Weiland JD, Cela CJ, Jadvar H, Lazzi G, Dhrami-Gavazi E, Tsang SH (2012) Preservation of retinotopic map in retinal degeneration. *Exp Eye Res* 98:88-96.
- Zar LH (1999) *Biostatistical Analysis*, 4th Edition: Prentice Hill.

### A. Phase-encoded stimulation to the fingertips

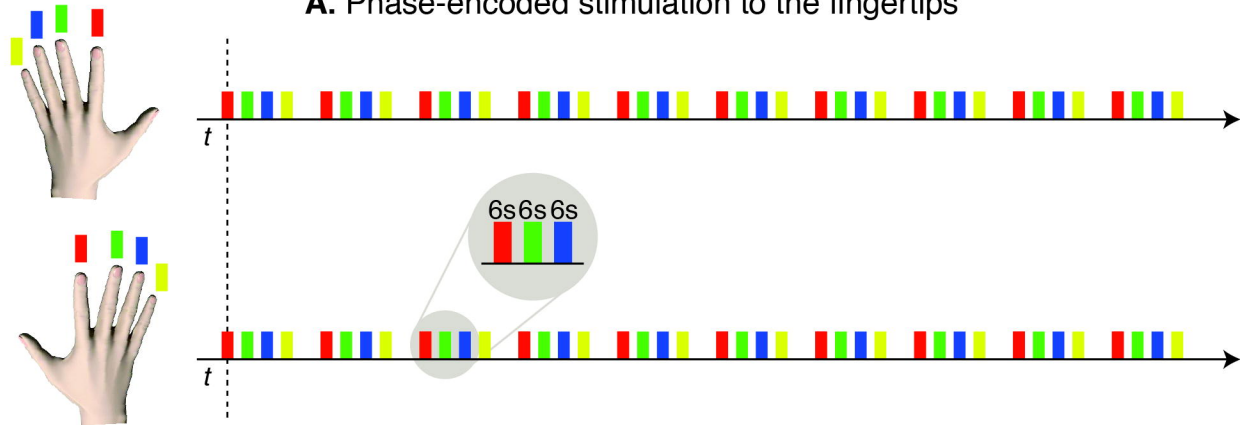

### B. Illustrative phase-encoded response to periodic finger stimulation

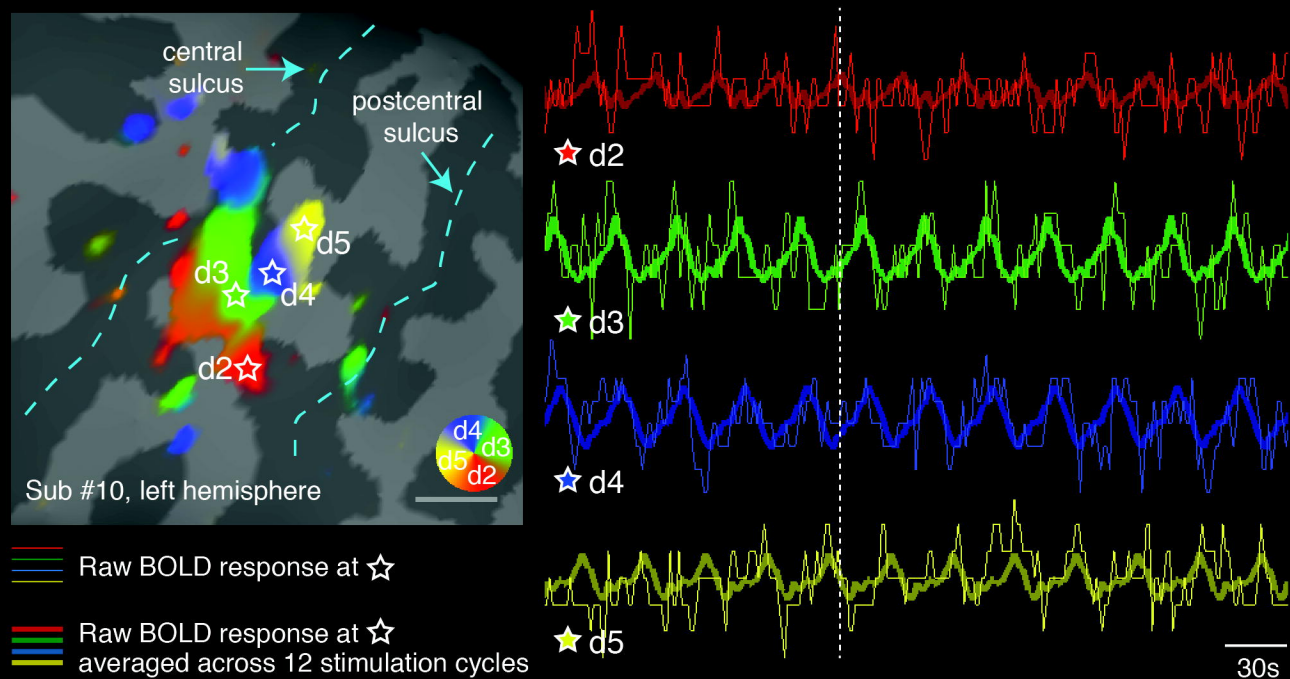

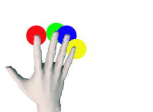

Left hemisphere

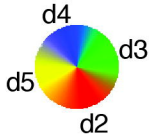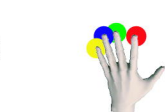

Right hemisphere

Control

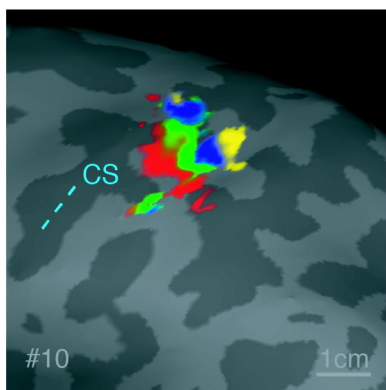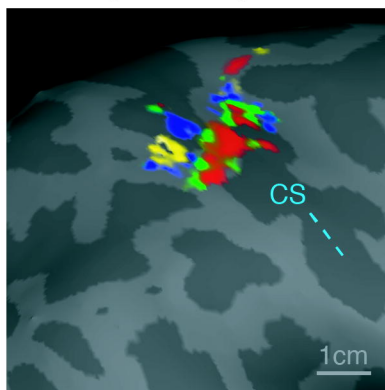

CRPS to the left hand

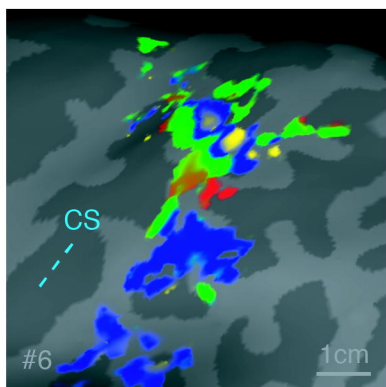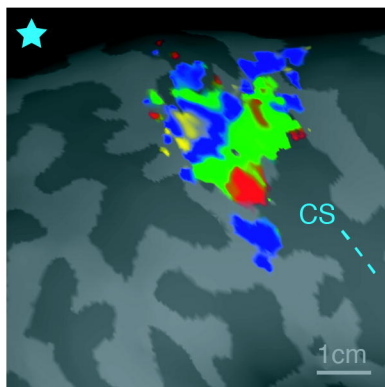

CRPS to the left hand

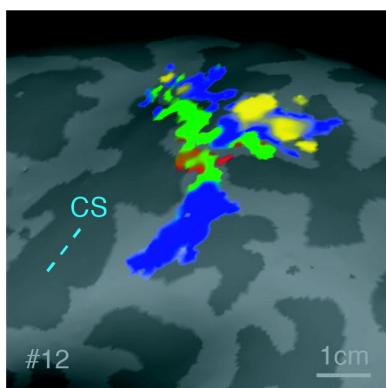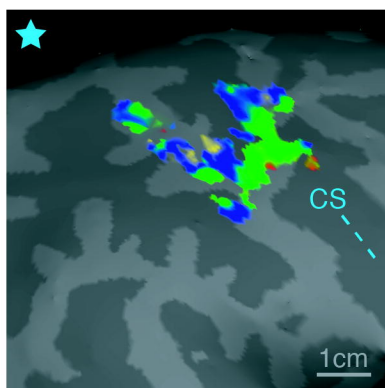

CRPS to the right hand

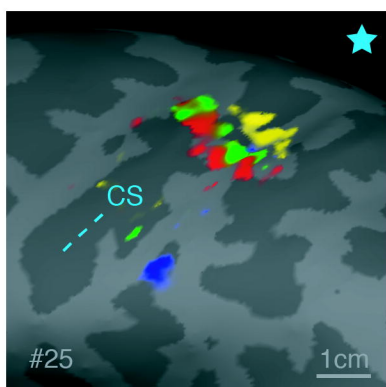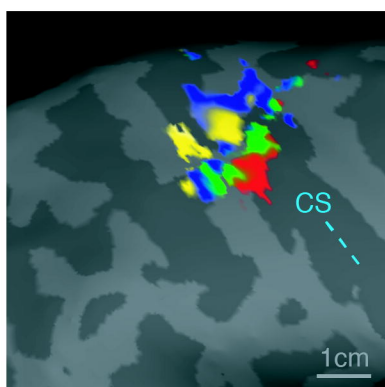

★ map of the CRPS hand



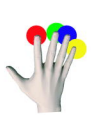

Left hemisphere

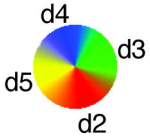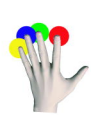

Right hemisphere

Controls

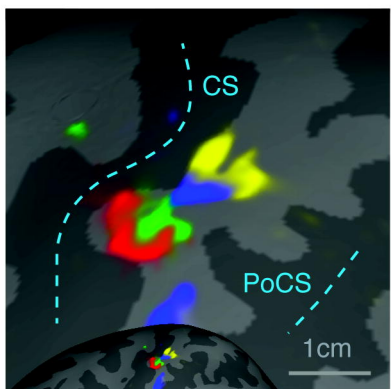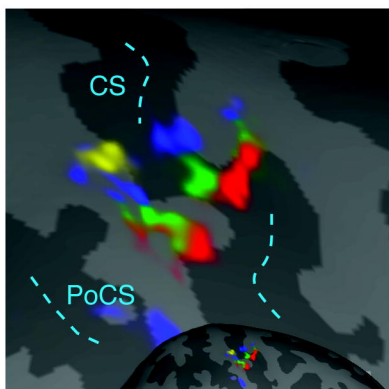

CRPS to the right hand

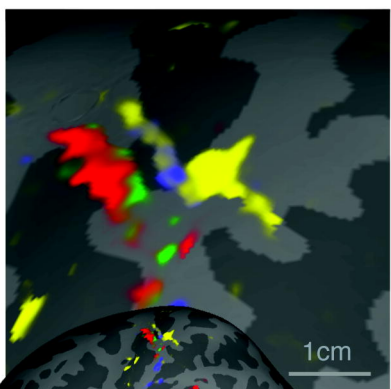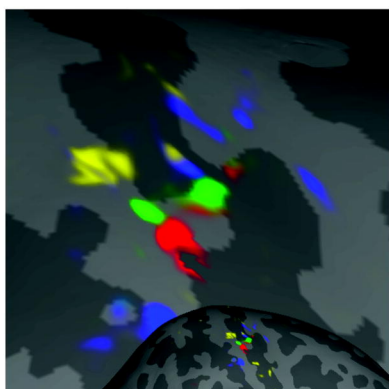

CRPS to the left hand

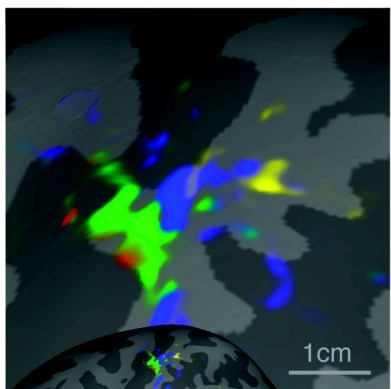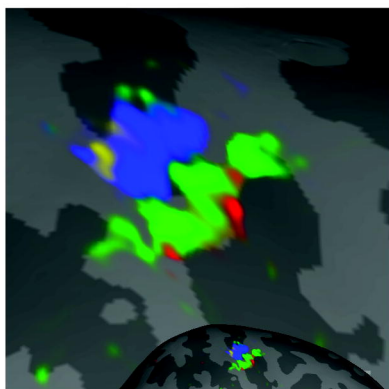

## A. Map Area

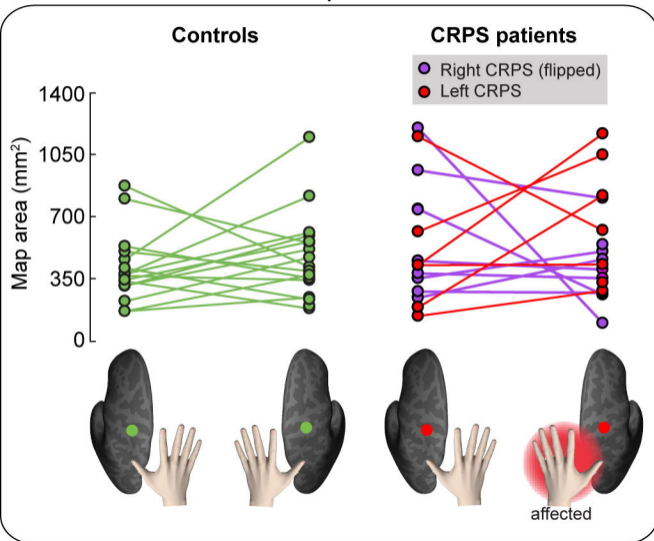

## B. Map Area by CRPS duration

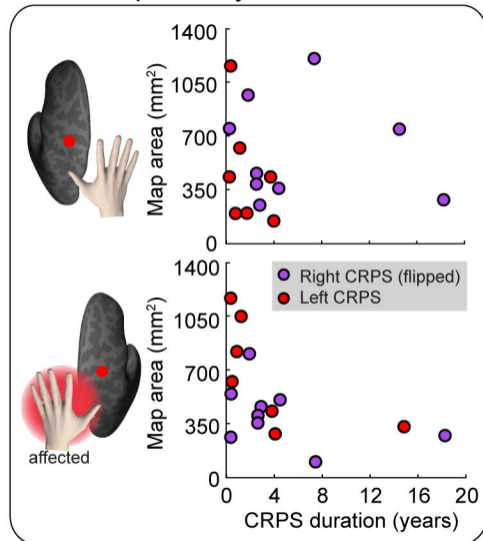

# Location of map centroid

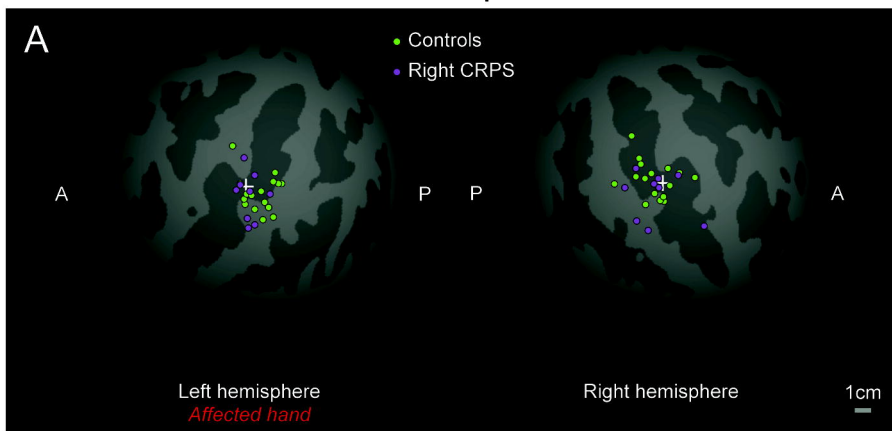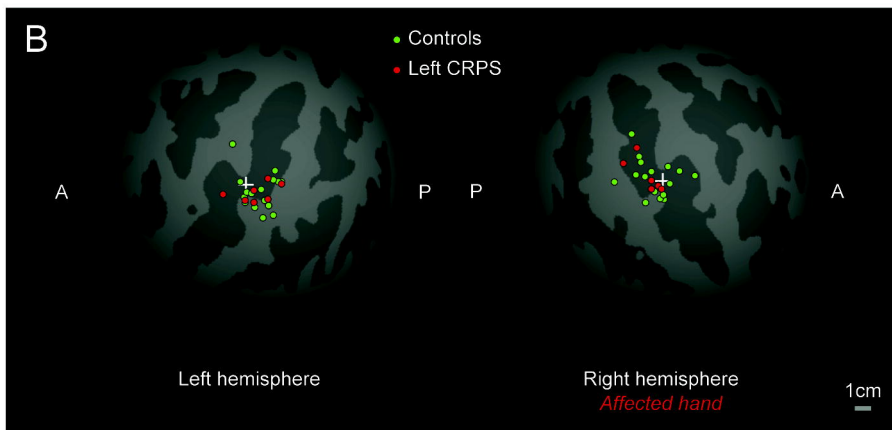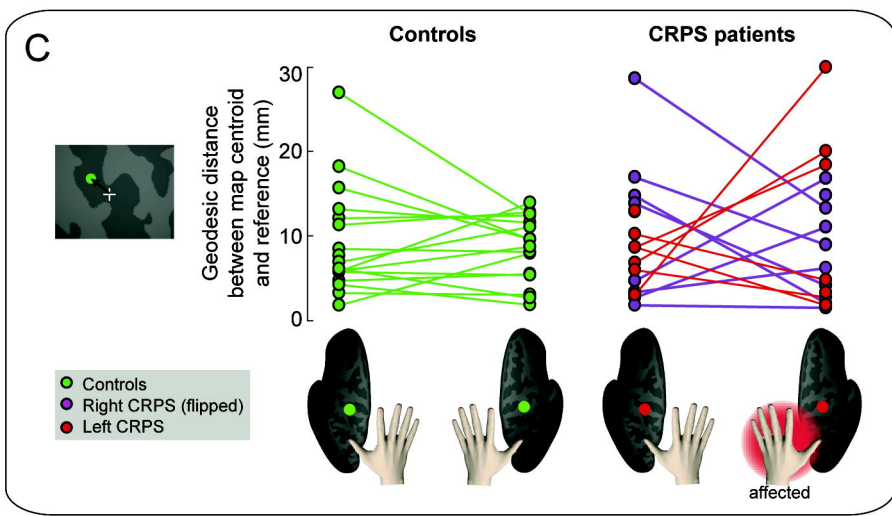

## A. Gradients of hand map

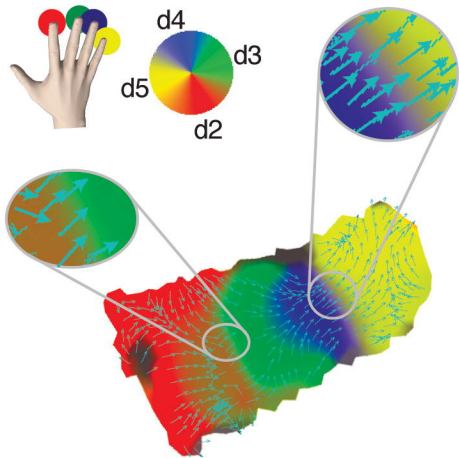

## B. Variance of map gradients

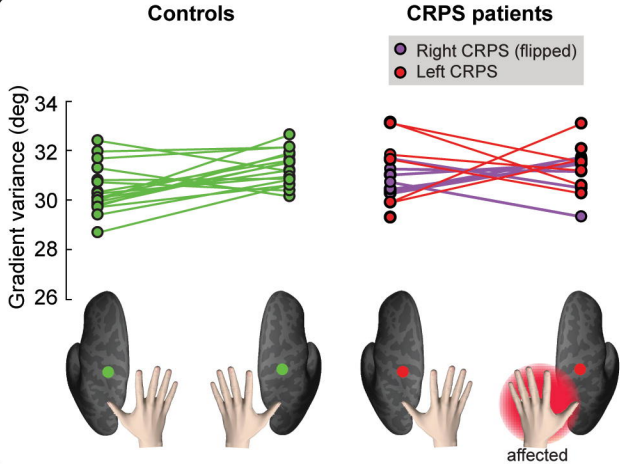

Source: https://www.biorxiv.org/content/10.1101/409094v1.full.pdf
